# Supplementary material for: A change in the relationship between ENSO and the South Atlantic Subtropical Dipole in the past four decades
Source: Copernicus journal article supplement (doi:10.5194/egusphere-2023-2436), 2023-12-11
Supplement: Supplementary file 1 [file egusphere-2023-2436-supplement.pdf]

## Supplemental Materials

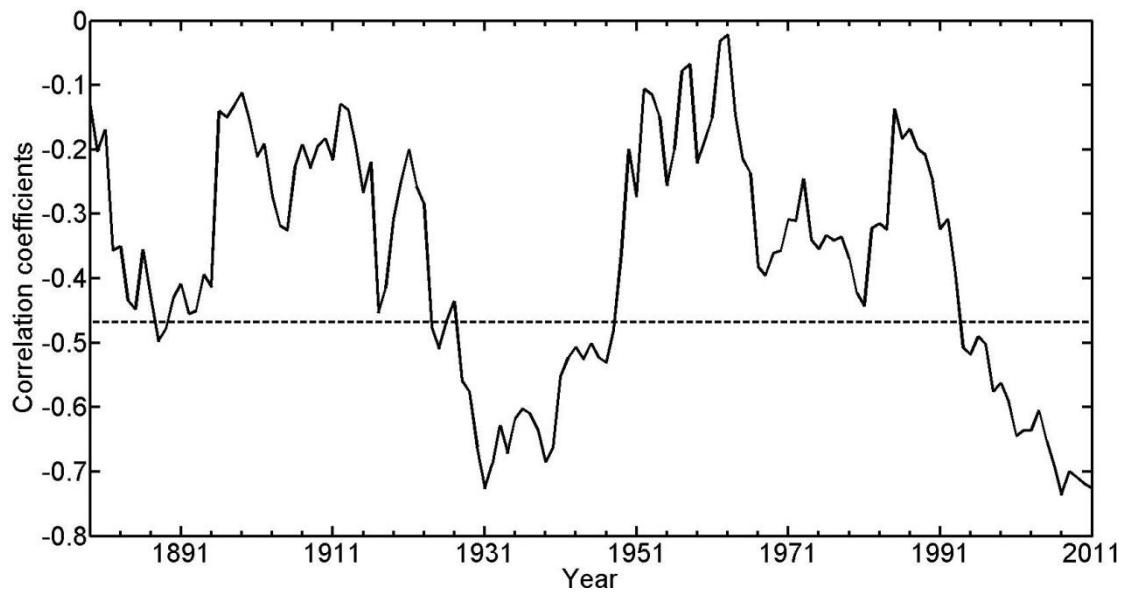

Figure S1. The 18-year moving correlations between the Niño3.4 and SASD indices from 1871 to 2020. The dashed line denotes the correlation coefficients with the above 95% confidence.

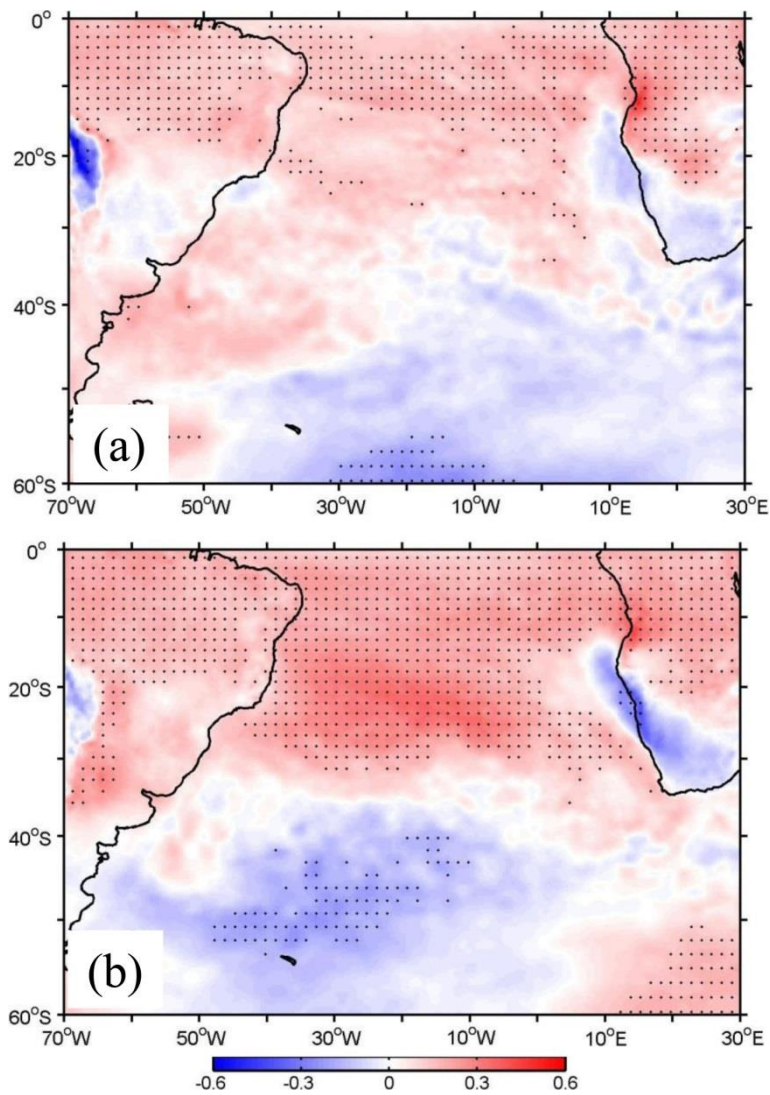

Figure S2. Regression maps of accumulated downward longwave radiation anomalies ( $10^6 \text{ W m}^{-2}$ ) onto the Niño 3.4 index for austral summer over the periods of 1979-1999 (a) and 2000-2020 period (b). Dotted regions denote the above 95% confidence level.

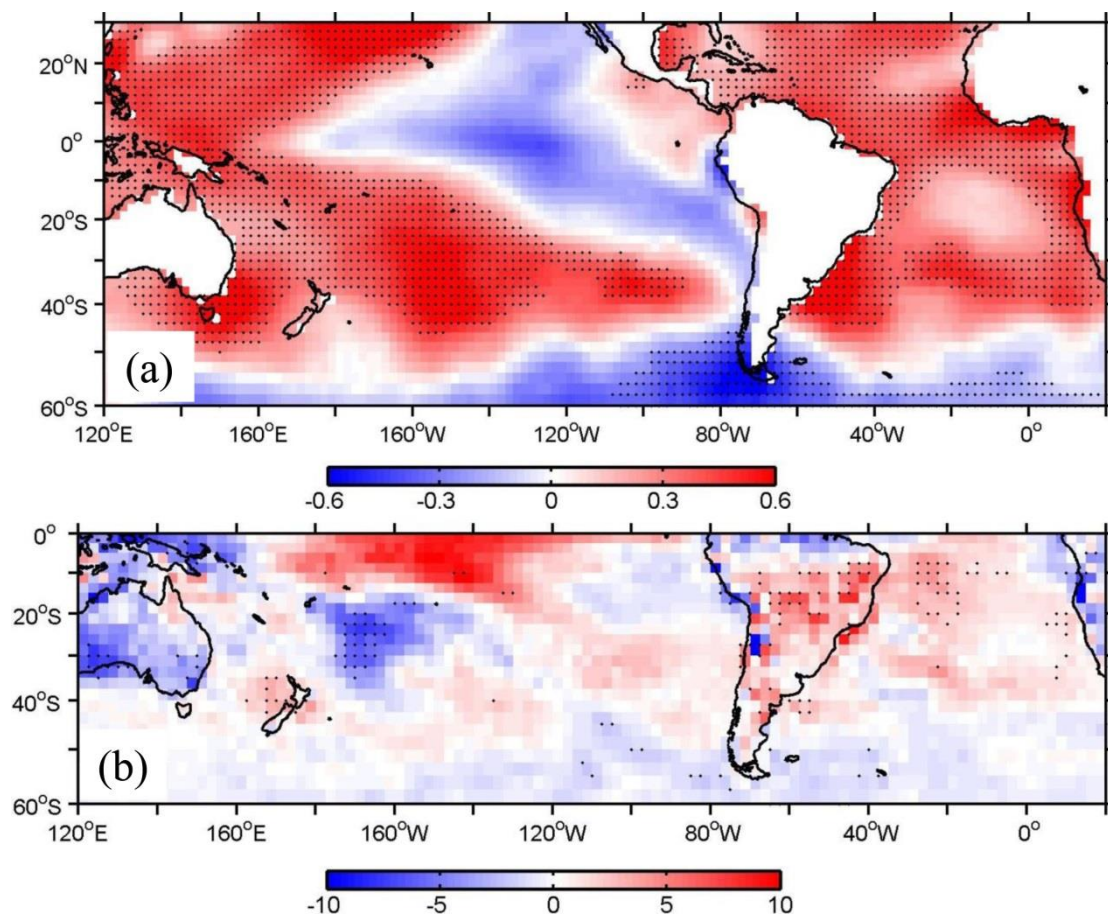

Figure S3. Difference of SST ( $^{\circ}\text{C}$ ) (a) and OLR ( $\text{W m}^{-2}$ ) (b) between the periods of 2000-2020 and 1979-1999. Dotted regions indicate the above 95% confidence level.

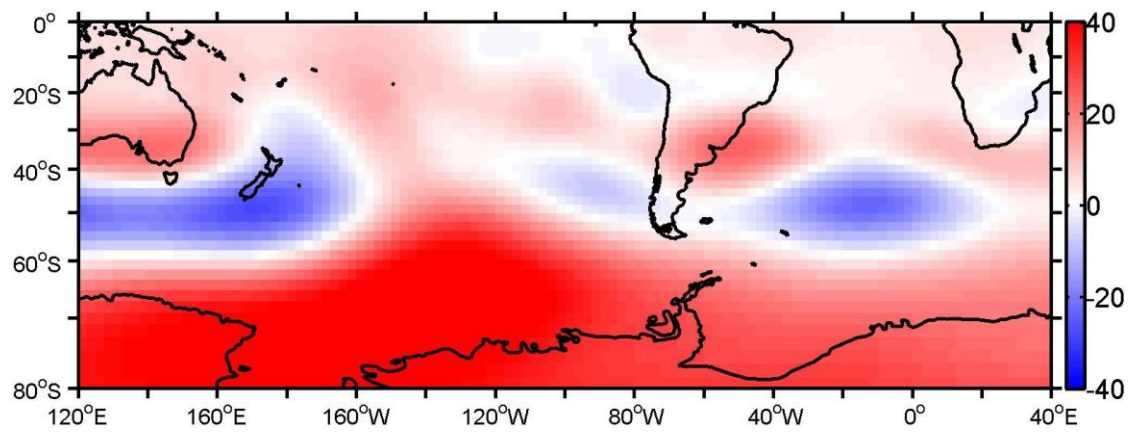

Figure S4. Anomalous 200-hPa geopotential height (gpm) of the idealized numerical experiment with a +2 °C SST anomaly introduced in the Indo-Pacific Warm Pool region (20°S-40°S, 180°-140°W) minus the control experiment using the CAM5 model.

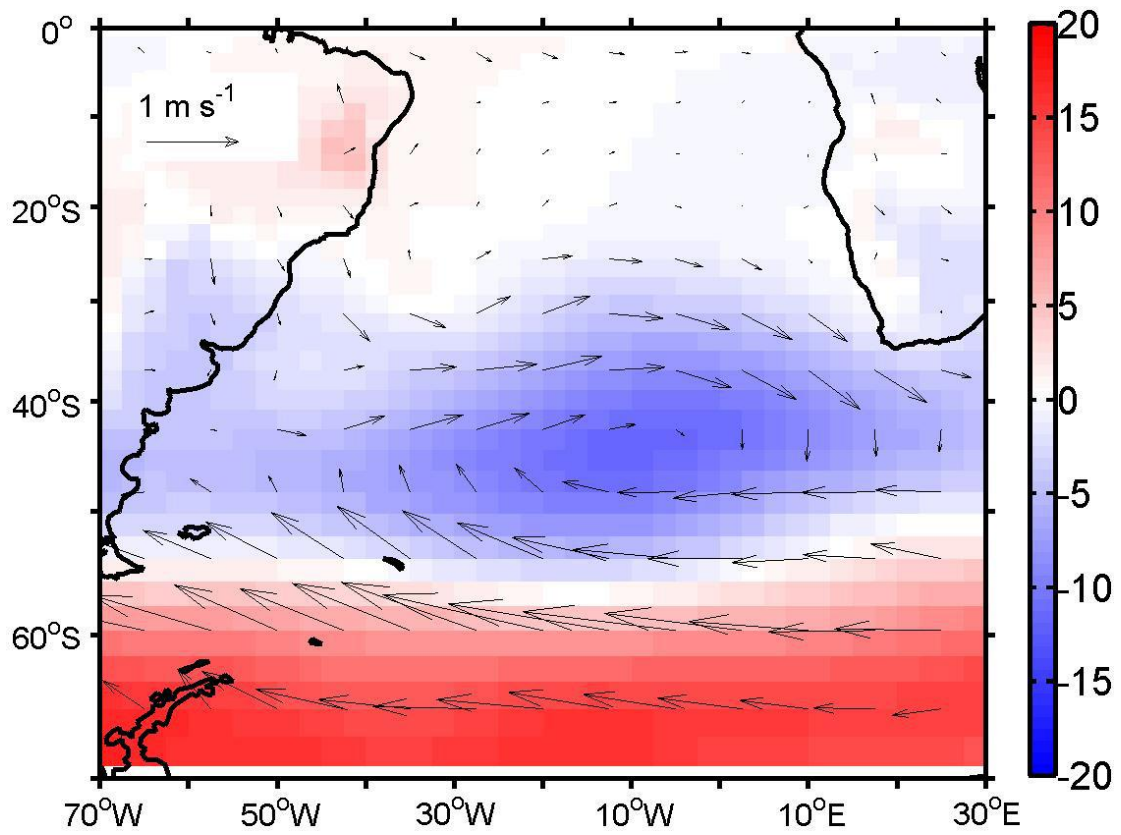

Figure S5. Anomalous 1000-hPa geopotential height (gpm) and wind field of the idealized idealized numerical experiment with a +2 °C SST anomaly introduced in the Indo-Pacific Warm Pool region (20 °S-40 °S, 180 °-140 °W) minus the control experiment using the CAM5 model.



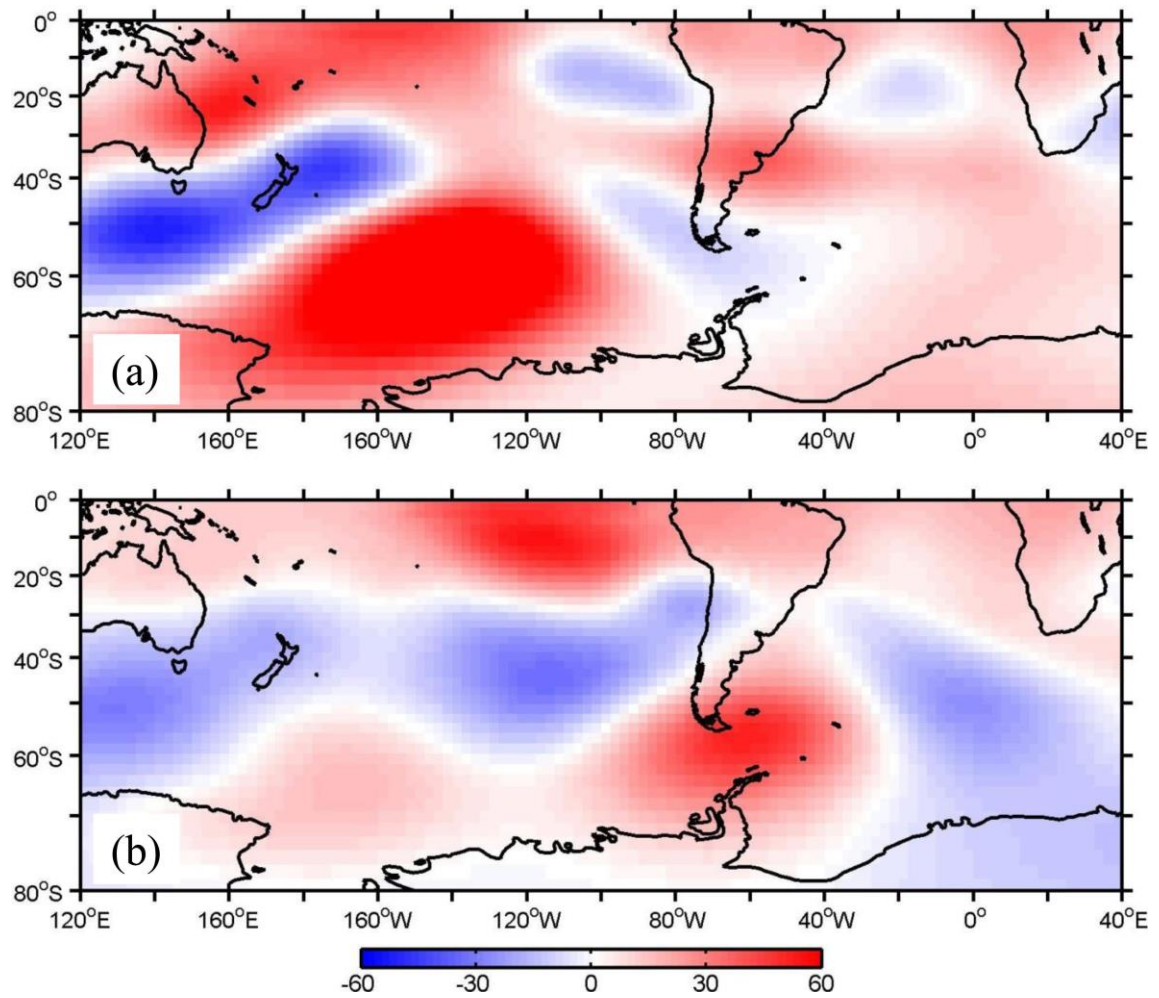

Figure S6. Anomalous 200-hPa geopotential height (gpm) of the idealized numerical experiment with +2°C SST over the Central Tropical Pacific (5°N-5°S, 160°E-150°W) (a) and +2°C SST over the East Tropical Pacific (5°N-5°S, 150°W-90°W) (b) minus the control experiment using the CAM5 model.

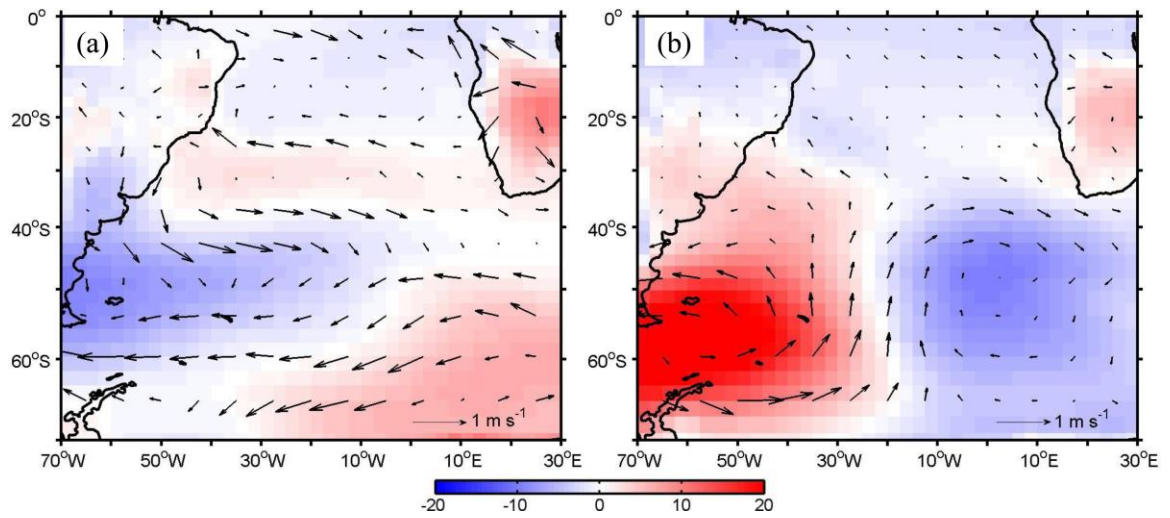

Figure S7. Anomalous 1000-hPa geopotential height (gpm) of the idealized numerical experiment with +2°C SST over the Central Tropical Pacific (5°N-5°S, 160°E-150°W) (a) and +2°C SST over the East Tropical Pacific (5°N-5°S, 150°W-90°W) (b) minus the control experiment using the CAM5 model.
